1

2

3

4 **Prevalence and determinants of neonatal danger signs in**  
5 **northwest Ethiopia: a multilevel analysis**

6

7 **Authors:** Tariku Nigatu<sup>1\*</sup>, Abebaw Gebeyehu<sup>1</sup>, Alemayehu Worku<sup>2</sup>, Gashaw  
8 Andargie<sup>1</sup>, Zemene Tigabu<sup>3</sup>

9 **\*Corresponding Author**

10 Email: [trknigatu@gmail.com](mailto:trknigatu@gmail.com)

11 Mobile: +251911795443

12 **Authors affiliations:**

13 1. Institute of Public Health, University of Gondar, Ethiopia

14 2. School of Public Health, Addis Ababa University, Ethiopia

15 3. Department of Pediatrics and Child Health, University of Gondar, Ethiopia

16

17

18 **Abstract:**

19 **Background:** There is association between neonatal danger signs and neonatal deaths.  
20 Hence, understanding the factors associated with the occurrence of neonatal danger signs  
21 help reduce the stagnating neonatal mortality in countries like Ethiopia.

22 **Method:** A cross sectional community and facility linked study was conducted in 39 kebeles  
23 in Amhara region, North Gondar Zone of Ethiopia from March 3-18, 2016. A representative  
24 sample of 1,150 mother-newborn pairs were included in the study. Percentage was used to  
25 calculate the prevalence. Multilevel analysis was used to identify individual and kebele level  
26 characteristics associated with the occurrence of neonatal danger signs.

27 **Result:** The result showed that around a quarter, 286 (24.9%), of the newborns experienced  
28 one or more danger signs during the neonatal period. Significant differences were found  
29 between groups/kebeles in the occurrence of danger signs. At individual level, having low  
30 birth weight (AOR= 0.65; 95% CI: 0.48-0.88) and maternal danger signs during pregnancy  
31 and delivery (AOR= 1.93; 95% CI: 1.41-2.65) were found to be significantly associated with  
32 the occurrence of neonatal danger signs. At group/kebele level, antenatal care coverage  
33 (AOR= 0.35; 95% CI: 0.13-0.93) and year of health extension workers experience (AOR=  
34 0.91; 95 % CI: 0.84-0.99) were significantly associated with the occurrence of neonatal  
35 danger signs.

36 **Conclusion:** The prevalence of neonatal danger signs is high. There are individual and  
37 kebele level characteristics associated with occurrence of danger signs in newborns.  
38 Expanding maternal health services and strengthening the health extension program is  
39 critical. **Key Words:** neonatal danger signs, newborn danger signs, newborn illnesses

## 40 **Background**

41 The neonatal period marks the transition from intrauterine to extra uterine life. Usually the  
42 transition is smooth. Sometimes however, the process can be complicated leading to neonatal  
43 mortality(1).

44 Every day, an estimated 7,700 newborns die globally(2). The vast majority of these deaths  
45 happen in resource limited settings including Ethiopia(3). Linked with the high prevalence of  
46 home delivery in developing countries, most neonatal deaths occur at home(4).

47 Even though global efforts halved neonatal mortality from 4.7 million to 2.8 million between  
48 1990 and 2013(5), the contribution of neonatal deaths to under five childhood mortality  
49 consistently grew from 37% to 44% in the same period(6)(7). The reason being a slow  
50 decline in neonatal mortality compared to under-five deaths(6)(8).

51 Similar trends are also observed in Ethiopia. According to the Ethiopian Demographic and  
52 Health Survey (EDHS), neonatal deaths declined from 49 deaths per 1000 live births in 2000  
53 to 29 deaths per 1000 live births in 2016(9). However, the reduction was slow and  
54 sometimes stagnant resulting in a growing contribution to under-five mortality(10).

55 UNICEF and WHO identify the following nine symptoms as danger signs in newborns: 1)  
56 Not feeding since birth or stopped feeding, 2) Convulsions, 3) Respiratory rate of 60 or more,  
57 4) Severe chest in-drawing, 5) Temperature  $\geq 37.5^{\circ}$  C, 6) Temperature  $\leq 35.5^{\circ}$  C, 7)  
58 movement only when stimulated or not even when stimulated, 8.)Yellow soles (sign of  
59 jaundice) and signs of local infection and, 9) Reddened or pus draining umbilicus, skin boils,  
60 or pus draining eyes(11).

61 These danger signs in newborns are nonspecific and each danger sign can be a sign of almost  
62 any disease or illness (12). Lack of knowledge about these neonatal danger signs is also a  
63 major barrier to treatment seeking (13–16), which may ultimately lead to neonatal  
64 death(12,17).

65 Better understanding of neonatal danger signs and the factors that affect their occurrence is  
66 very important to help reduce neonatal mortality. Evidence is also scarce on the factors  
67 responsible for newborn danger signs. This study is conducted to determine the prevalence of  
68 and identify factors operating at multiple levels; individual and contextual factors; that are  
69 associated with the occurrence of neonatal danger signs.

## 70 **Methods**

### 71 **Study design, setting and source population**

72 A cross sectional community and facility linked study was conducted from March 3-18, 2016  
73 in North Gondar Zone of Ethiopia. North Gondar is in Amhara region located in the  
74 northwest part of Ethiopia (18). The zone has 24 woredas (districts). According to the  
75 Central Statistical Agency (CSA), in 2017, the total projected population in the zone based  
76 on the 2007 national population and housing census was 3,654,920 of which 1,847,631  
77 (51%) were males (CSA, 2017). As of 2016, the zone has 9 government hospitals, 126 health  
78 centers and 563 health posts. There are also many private clinics most of them located in  
79 urban areas.

80

81

## 82 **Study population**

83 Women who delivered live babies in the past six months. Health extension workers and  
84 health posts found in the study area were included in the study. Health extension workers  
85 (HEWs) are female, salaried, frontline health workers that provide basic health promotion  
86 and disease prevention services to rural communities in Ethiopia. The HEWs provide the  
87 services in house to house visit and at a health post.

## 88 **Variables**

### 89 **Outcome variable**

90 The occurrence of neonatal danger signs during the first 28 days of life was the outcome  
91 variable.

### 92 **Independent variables**

93 Individual and kebele level characteristics were examined for possible associations with  
94 neonatal danger signs. Kebele is the smallest political administrative unit below district with  
95 an estimated average population size of 5000. The conceptual framework depicting the  
96 assumed relationships between kebele and individual level characteristics with the outcome  
97 variable is shown below (Figure 1).

### 98 **Individual level variables**

99 Individual-level variables included maternal and neonatal characteristics. Maternal  
100 characteristics included: maternal age, occupation, exposure to health education, gravidity,  
101 insecticide treated nets (ITN) use during the last pregnancy, whether the pregnancy of the  
102 indexed child was wanted or not , occurrence of maternal danger signs during pregnancy and

103 the uptake of skilled birth attendance during the last delivery. Newborn characteristics were  
104 measured based on the reports of the mother. These included; occurrence of danger signs in  
105 the newborn, birth weight, and sex of the newborn.

106 In settings where children are not often weighed at birth, the mothers' report of the size of  
107 their babies at birth is used as the proxy for the child's weight(10). In this study, birth weight  
108 of the newborns was measured by asking mothers to rate the birth weight of the indexed  
109 newborn as very small, small, normal, big and very big. Newborns rated as very small and  
110 small were re-categorized as small and those rated normal and above were rated as normal  
111 during analysis. In addition, household wealth index was constructed using principal  
112 components analysis. The wealth index was weighted for urban and rural areas before  
113 producing the combined wealth index.

#### 114 **Kebele level variables**

115 Groups of mothers and newborns are clustered within kebeles. There is one health post in  
116 each Kebele providing basic disease prevention and health promotion services for the kebele  
117 population. Health post level service coverage and other health related data were taken as  
118 kebele level characteristics. These included coverage of at least one antenatal and postnatal  
119 care, number of health extension workers (HEWs) working at each health post and the  
120 average number of days HEWs spend for house to house visit per week and the experiences  
121 of HEWs in years.

#### 122 **Sample size and sampling**

123 Two population proportion formula was used to calculate sample size using statcalc in Epi-  
124 Info version 7.1.5.0. Variables taken from two studies were used to calculate the sample

125 size(15,19) Sample sizes were calculated independently based on the two studies by  
126 assuming 95% confidence level ( $1-\alpha$ ), 80% power ( $1-\beta$ ) and unexposed to exposed ratio of  
127 1:1. The larger calculated sample size based was 388. With a design effect of 2, and non-  
128 response rate of 10%, the final sample size was 854 mother-newborn pairs. This study was  
129 part of a bigger study with a sample size of 2,158 mothers. Of this sample, 1,150 of the  
130 mothers had delivered a live baby in the past six months. Hence, the sample size was taken as  
131 sufficient for this study.

132 A multistage stratified cluster sampling technique was used to select the mothers. First, 39  
133 kebeles were randomly selected from three districts (Debank, Dabat and Wogera)  
134 proportional to the size of kebeles in the woredas. Then, villages or “Gotes” from the  
135 selected kebeles were randomly selected. Data was collected from mothers in all eligible  
136 households in the clusters or “Gotes”. Kebele level data was collected from health posts  
137 service statistics reports and interviews with HEWs.

### 138 **Data Collection**

139 Fifty four data collectors and five supervisors, all of them with at least first degree in health,  
140 were recruited and received two day training. A pretested structured interviewer administered  
141 questionnaire was used to collect data on individual level characteristics. The questions were  
142 adapted from different surveys. Structured questionnaire was used for data collection from  
143 HEWs and health posts.

144

145

## 146 **Data Processing and Analysis**

147 The data was entered and cleaned using Epi-Info version 7.1.5.0. Data cleaning was made by  
148 running frequencies and descriptive statistics. The cleaned data was exported to STATA  
149 version 13 for analysis.

## 150 **Descriptive analyses**

151 First, exploratory descriptive statistics was applied to understand the nature of the data. The  
152 frequencies of each of the categories within the explanatory variables were calculated. The  
153 overall study area prevalence was also estimated. Multiple response analysis was conducted  
154 to determine the prevalence of each danger signs.

## 155 **Modelling approaches**

156 Two-level multivariable logistic regression was applied to account for the hierarchical nature  
157 of the data and to get unbiased estimate of regression coefficients. Three models were fitted  
158 in the analysis. Model one, the empty or unconditional model, decomposed the total variance  
159 in the dependent variable in to individual and group/kebele level variances. The portion of  
160 the total variance explained by kebele level characteristics was measured by the intra-class  
161 correlation coefficient (ICC). The chi-squared test that compares the empty nested model  
162 with the classical logistic model was used to test the significance of kebele level  
163 characteristics in explaining the total variance of the outcome variable. Model two included  
164 all the individual-level variables (maternal and neonatal). In model two, we assessed the  
165 compositional effect of kebeles in explaining the variance among the groups (kebeles).  
166 Model three encompassed the combined effect of individual and kebele-level characteristics.  
167 With the third model, we determined the significance of individual and kebele level  
168 characteristics in explaining the variances among the groups.



169 **Fixed effects**

170 The relationships between individual and kebele-level characteristics with the occurrence of  
171 neonatal danger signs were reported in term of odds ratios with p-values at 95% confidence  
172 interval.

173 **Random effects**

174 Random effects that measure the variations among the groups/kebeles were expressed in  
175 terms of Intra-class correlation (ICC).

176 **Model fitness & precision**

177 The log likelihood of the models were estimated to assess the fitness of the model relative to  
178 the other models. Variance Inflation Factor was used to test the presence of multicollinearity  
179 in the model. Stata software package of version 14 was used for the analyses. Statistical  
180 significance of the predictor variables were determined by two tailed Wald test at a 5% level  
181 of significance.

182 **Ethical Considerations**

183 The study was reviewed and approved by the University of Gondar Institutional Review  
184 Board (IRB). Permission was obtained from all kebeles in the study areas. During data  
185 collection, study subjects were asked for oral informed consent. For adolescent mothers  
186 below the age of 18, informed consent was taken as per the National Research Ethics Review  
187 Guideline's recommendation for emancipated minors and with the approval of the IRB. All  
188 study participants were invited to participate voluntarily in the study. In addition, they were  
189 informed on the potential benefits, harms, the confidentiality and the possibility of  
190 withdrawing from the interview even without giving reasons. All interviews were conducted  
191 in private settings.

192 **Result**

193 **Socio-demographic characteristics**

194 A total of 1,150 mother-newborn pairs were included in the study. Most, 1,059(92.1%), of  
195 the mothers resided in rural areas. The mean ( $\pm$ SD) and median (IQR) age of the mothers  
196 were 27.5( $\pm$ 6.7) and 27(10) years, respectively.

197 Nearly a third, 393 (34.1%), of the mothers were young aged 15-24 years. Farming was the  
198 main, 1,066(92.7%), source of livelihood in the study areas. The majority, 743(64.6%) and  
199 938 (81.6%), of the mothers were illiterate and had history of two or more pregnancies,  
200 respectively. Most of the deliveries, 713(62.0), for the indexed newborns were attended by  
201 unskilled birth attendants. Nearly all of the pregnancies for the indexed newborns,  
202 1,126(98%), were spaced less than 24 months. More than a quarter, 271(23.6%), of these  
203 pregnancies were unintended (Table 1).

204

205 **Table 1: General characteristics of the study population: individual characteristics;**  
 206 **northwest Ethiopia, March 2016**

| Variables                           | Number (%) | Danger sign |     |
|-------------------------------------|------------|-------------|-----|
|                                     |            | Yes         | No  |
| <b>Maternal characteristics</b>     |            |             |     |
| <b>Wealth index</b>                 |            |             |     |
| Poorest                             | 217 (18.9) | 72          | 145 |
| Poor                                | 230(20.0)  | 55          | 175 |
| Medium                              | 234(20.3)  | 60          | 174 |
| Rich                                | 221(19.2)  | 41          | 180 |
| Richest                             | 248(21.6)  | 58          | 190 |
| <b>Age</b>                          |            |             |     |
| 15-19                               | 119(10.3)  | 33          | 86  |
| 20-24                               | 274(23.8)  | 62          | 212 |
| 25-29                               | 292(25.4)  | 77          | 215 |
| >30                                 | 465(40.4)  | 114         | 351 |
| <b>Educational status of mother</b> |            |             |     |
| Illiterate                          | 743(64.6)  | 188         | 555 |
| Able to read and write              | 38(3.3)    | 13          | 25  |
| 1-4 <sup>th</sup> grade             | 117(10.2)  | 32          | 85  |
| 5-8 <sup>th</sup> grade             | 149(13.0)  | 29          | 120 |
| 9-10 <sup>th</sup> grade            | 84(7.3)    | 18          | 66  |
| 11-12 <sup>th</sup> grade           | 8(0.7)     | 2           | 6   |
| Higher education                    | 11(1.0)    | 4           | 7   |

|                                                     |            |     |     |
|-----------------------------------------------------|------------|-----|-----|
| <b>Mothers Occupation</b>                           |            |     |     |
| Farmer                                              | 1066(92.7) | 263 | 803 |
| Government employee                                 | 12(1.0)    | 4   | 8   |
| Other (merchant, daily laborer)                     | 72(6.3)    | 19  | 53  |
| <b>Gravidity</b>                                    |            |     |     |
| 1                                                   | 212(18.4)  | 55  | 157 |
| 2-5                                                 | 709(61.7)  | 170 | 539 |
| >6                                                  | 229(19.9)  | 61  | 168 |
| <b>Birth Attendance</b>                             |            |     |     |
| Unskilled (including HEWs)                          | 713(62.0)  | 187 | 526 |
| Skilled                                             | 437(38.0)  | 99  | 338 |
| <b>Pregnancy was unintended</b>                     |            |     |     |
| Yes                                                 | 879(76.4)  | 210 | 669 |
| No                                                  | 271(23.6)  | 76  | 195 |
| <b>Health education by health extension workers</b> |            |     |     |
| Yes                                                 | 518(45.0)  | 108 | 410 |
| No                                                  | 632(55.0)  | 178 | 454 |
| <b>Heard about danger signs before</b>              |            |     |     |
| Yes                                                 | 474(41.2)  | 92  | 382 |
| No                                                  | 676(58.8)  | 194 | 482 |
| <b>Neonatal characteristics</b>                     |            |     |     |
| <b>Sex of newborn</b>                               |            |     |     |
| Female                                              | 571(49.7)  | 139 | 432 |
| Male                                                | 579(50.3)  | 147 | 432 |

| <b>Birth weight</b>  |            |     |     |
|----------------------|------------|-----|-----|
| Small                | 611 (0.53) | 174 | 437 |
| Normal               | 539 (0.47) | 112 | 427 |
| <b>Birth order</b>   |            |     |     |
| 1 <sup>st</sup>      | 215 (0.19) | 53  | 162 |
| 2 <sup>nd</sup>      | 194 (0.17) | 53  | 141 |
| 3 <sup>rd</sup>      | 182 (0.16) | 41  | 141 |
| 4 <sup>th</sup>      | 183(0.16)  | 39  | 144 |
| $\geq 5^{\text{th}}$ | 376(0.33)  | 100 | 276 |

207

208 The percentage of male and female newborns was almost the same. A little more than half,  
209 611 (53%), of the newborns were rated to have small birth weight at the time of birth. A third  
210 of, 376(33%), the newborns were either the 5<sup>th</sup> or more children in the family (Table 1).

211 The coverages of maternal health services (antenatal care (ANC), skilled delivery and  
212 postnatal care), and the average number of health extension workers, their experience in  
213 years and the average number of days they spent in house to house visit and community level  
214 health related activities is shown below (Table 2).

215

216 **Table 2: General characteristics of the study population: Kebele level variables**

| <b>Health Post level characteristics</b>           | <b>Mean (<math>\pm</math> SD)</b> |
|----------------------------------------------------|-----------------------------------|
| At least one or more ANC coverage in the Kebele    | 0.65 ( $\pm$ .23)                 |
| PNC coverage in the Kebele                         | 0.59 ( $\pm$ .23)                 |
| Skilled birth attendance                           | 0.43( $\pm$ .22)                  |
| Average number of days HEWs spend in the community | 2.3 ( $\pm$ 1.46)                 |
| HEWs average year of experience in years           | 7.78( $\pm$ 2.89)                 |
| Number of HEWs working in the Kebele               | 2.05( $\pm$ .55)                  |

217

218 **Prevalence of neonatal danger signs**

219 The mothers reported that around a quarter, 286 (24.9%), of the newborns experienced one or  
220 more of the WHO defined danger signs during the neonatal period. Mothers from the poorest  
221 households reported the highest percent of cases of neonatal dangers signs (Table 1).

222 The commonest neonatal danger sign reported was fever, 213(74.5%), followed by fast  
223 breathing and difficulty breathing, 127 (44.4%) and 107 (37.4%), respectively. The least  
224 reported danger sign was yellow soles and feet (jaundice), 14 (4.9%) (Table 3).

225

226 **Table 3: Distribution of neonatal danger signs, northwest Ethiopia, March 2016**

| Danger signs                       | Responses |         | Percent of Cases |
|------------------------------------|-----------|---------|------------------|
|                                    | N         | Percent |                  |
| Fever                              | 213       | 28.00   | 74.50            |
| Hypothermia                        | 48        | 6.30    | 16.80            |
| Fast breathing                     | 127       | 16.70   | 44.40            |
| Difficulty of breathing            | 107       | 14.10   | 37.40            |
| Red swollen and pusy eye           | 55        | 7.20    | 19.20            |
| Red swollen and pusy umbilicus     | 65        | 8.50    | 22.70            |
| Convulsion                         | 22        | 2.90    | 7.70             |
| Floppiness and absence of movement | 28        | 3.70    | 9.80             |
| Yellow soles and feet (jaundice)   | 14        | 1.80    | 4.90             |
| Inability to suck                  | 82        | 10.80   | 28.70            |
|                                    | 761       | 100.00  | 266.10           |

227

228 **Random effects**

229 Significant heterogeneity was observed among kebeles. The ICC calculated based on the null  
 230 or empty model was significant at 0.094 implying that 9.4% of the total variance in the  
 231 occurrence of neonatal danger signs was attributed to the differences among kebeles/groups.  
 232 This also implies that the correlation between newborns living in the same kebele in the  
 233 likelihood of having neonatal danger sign was 0.09.

234 A significant reduction in kebele-level variance was observed in model two. This indicated  
235 the significance of the compositional effect (individuals within the kebeles) in explaining the  
236 between group variance.

237 However, we extended model two by introducing kebele level characteristics to form model  
238 three. In the final model (model three), kebele-level variance was significantly reduced  
239 further after adjusting for both individual and community-level characteristics.

#### 240 **Fixed effects**

241 Fixed effects of model two show the associations between individual-level characteristics  
242 and the occurrence of neonatal danger signs when kebele-level characteristics were not  
243 considered. Fixed effects of model three show the associations of both individual and kebele-  
244 level characteristics with neonatal danger signs.

245 After considering both individual and kebele-level characteristics in model three, it was  
246 observed that newborns with normal birth weight were 35 percent less likely to experience  
247 neonatal danger signs (AOR 0.65; 95% CI 0.48-0.88) compared to small birth weight  
248 newborns. Other newborn level characteristics in the study were not significantly associated  
249 with neonatal danger signs.

250 Similarly, a maternal level characteristic was also found to be significantly associated with  
251 neonatal danger signs. Newborns delivered by mothers who experienced one or more danger  
252 signs during pregnancy and delivery had 93% higher odds of having neonatal danger signs  
253 compared to newborns delivered from mothers who did not experience danger signs  
254 themselves (AOR 1.93; 95% CI 1.41-2.65).



255 Some kebele level characteristics were also significantly associated with the occurrence of  
256 neonatal danger signs in newborns. Antenatal care coverage of the kebele and year of health  
257 extension workers experience were associated with neonatal danger signs (AOR 0.35; 95%  
258 CI 0.13-0.93 and AOR 0.91; 95 % CI 0.84-0.99), respectively (Table 4).

259

260 **Table 4: Associations between neonatal mortality and individual and community level**  
 261 **determinants**

| <b>Variables</b>                           | <b>Model one</b> | <b>Model two</b>   | <b>Model three</b> |
|--------------------------------------------|------------------|--------------------|--------------------|
|                                            |                  | <b>AOR (95%CI)</b> | <b>AOR (95%CI)</b> |
| <b>Fixed Effect ( OR, 95% CI, P-value)</b> |                  |                    |                    |
| <b>Individual level determinants</b>       |                  |                    |                    |
| <b>Wealth index</b>                        |                  |                    |                    |
| Poorest                                    |                  | 1.06(.62-1.85)     | 1.08 (.58-2.00)    |
| Poor                                       |                  | .82 (.48- 1.43)    | .84 (.45-1.55)     |
| Medium                                     |                  | 1.08(.65- 1.78)    | 1.09(.62-1.92)     |
| Rich                                       |                  | .85 (.52-1.38)     | .86 (.50-1.48)     |
| Richest                                    |                  | 1 (reference)      | 1(reference)       |
| <b>Age</b>                                 |                  |                    |                    |
| 15-19                                      |                  | 1(reference)       | 1(reference)       |
| 20-24                                      |                  | .74 (.41-1.34)     | .73( .40-1.33)     |
| 25-29                                      |                  | .95 (.50- 1.80)    | .94(.49-1.79)      |
| >30                                        |                  | .83 (.42- 1.64)    | .82 (.41-1.63)     |
| <b>Educational status of mother</b>        |                  |                    |                    |
| Illiterate                                 |                  | 1(reference)       | 1(reference)       |

|                             |  |                  |                 |
|-----------------------------|--|------------------|-----------------|
| Able to read and write      |  | 1.29(.61-2.74)   | 1.30(.61- 2.79) |
| 1-4 <sup>th</sup> grade     |  | 1.10(.66-1.82)   | 1.11(.67- 1.84) |
| 5-8 <sup>th</sup> grade     |  | .73(.43-1.26)    | .76(.44- 1.31)  |
| 9-10 <sup>th</sup> grade    |  | .91(.46-1.81)    | .93( .47- 1.83) |
| Preparatory and college     |  | 1.34(.34- 5.35)  | 1.32 (.33-5.28) |
| <b>Mothers Occupation</b>   |  |                  |                 |
| Farmer                      |  | 1 (reference)    | 1(reference)    |
| Government employee         |  | 1.41 (.17-11.74) | 1.44(.17-11.96) |
| Other                       |  | 1.07 (.52-2.17)  | 1.14(.55- 2.37) |
| <b>Gravidity</b>            |  |                  |                 |
| 1                           |  | 1(reference)     | 1(reference)    |
| 2-5                         |  | .85(.50-1.44)    | .86(.51-1.46)   |
| >6                          |  | .97(.49-1.90)    | .10 ( .50-1.95) |
| <b>Birth Attendance</b>     |  |                  |                 |
| Unskilled (including HEWs)  |  | 1(reference)     | 1(reference)    |
| Skilled (HC/Hospital)       |  | .93(.64-1.35)    | .98(.67-1.42)   |
| <b>Pregnancy unintended</b> |  |                  |                 |
| Yes                         |  | .90(.63-1.27)    | .91(.65-1.29)   |

|                                                     |     |                  |                 |
|-----------------------------------------------------|-----|------------------|-----------------|
| No                                                  |     | 1(reference)     | 1(reference)    |
| <b>Health education by health extension workers</b> |     |                  |                 |
| Yes                                                 |     | .84(.59-1.18)    | .89(.63-1.25)   |
| No                                                  |     | 1 (reference)    | 1(reference)    |
| <b>Heard about danger signs before</b>              |     |                  |                 |
| Yes                                                 |     | .71(.50- .10)    | .73(.52-1.03)   |
| No                                                  |     | 1 (reference)    | 1(reference)    |
| <b>Birth weight</b>                                 |     |                  |                 |
| Small                                               |     | 1(reference)     | 1(reference)    |
| Normal                                              |     | 0.67(0.49-0.90)* | .65 (.48- .88)* |
| <b>Sex of newborn</b>                               |     |                  |                 |
| Female                                              |     | 1(reference)     | 1(reference)    |
| Male                                                |     | 1.02(.76-1.36)   | 1.01(.76-1.36)  |
| <b>Birth order</b>                                  |     |                  |                 |
| First                                               | 215 | 53               | 162             |
| Second                                              | 194 | 53               | 141             |
| Third                                               | 182 | 41               | 141             |
| Forth                                               | 183 | 39               | 144             |
| ≥Fifth                                              | 376 | 100              | 276             |

|                                                                                  |      |                    |                   |
|----------------------------------------------------------------------------------|------|--------------------|-------------------|
| <b>At least one ANC attendance</b>                                               |      |                    |                   |
| Yes                                                                              |      | 1.06 (.63-1.76)    | 1.03(.62-1.70)    |
| No                                                                               |      | 1(reference)       | 1(reference)      |
| <b>Use of ITN during the indexed pregnancy</b>                                   |      |                    |                   |
| Yes                                                                              |      | 1.38(.92-2.06)     | 1.29(.86-1.94)    |
| No                                                                               |      | 1(reference)       | 1(reference)      |
| <b>Danger sign during pregnancy and delivery</b>                                 |      |                    |                   |
| Yes                                                                              |      | 1.99 (1.45-2.73)** | 1.93(1.41-2.65)** |
| No                                                                               |      | 1(reference)       | 1(reference)      |
| <b>Community level determinants</b>                                              |      |                    |                   |
| <b>ANC coverage (one or more)</b>                                                |      |                    | .35(.13-.93)*     |
| <b>Skilled birth attendance coverage</b>                                         |      |                    | 1.93(.62- 6.00)   |
| <b>HEWs average experience in years</b>                                          |      |                    | .91(.84- .99)*    |
| <b>Average number of days HEWs spend in household visit and in the community</b> |      |                    | 1.05(.92-1.20)    |
| <b>Number of HEWs working at the Health post</b>                                 |      |                    | 1.05(.73-1.51)    |
| <b>Residence</b>                                                                 |      |                    |                   |
| Urban                                                                            |      |                    | 1(reference)      |
| Rural                                                                            |      |                    | 1.24(.59-2.63)    |
| <b>Random Effect</b>                                                             |      |                    |                   |
| Area Variance                                                                    | 0.34 | 0.21               | 0.13              |

|                |         |         |         |
|----------------|---------|---------|---------|
| Rho-ICC        | 9.4%    | 6%      | 4%      |
| Log likelihood | -628.61 | -596.48 | -590.59 |

262 \*p<0.05, \*\*p<0.001

### 263 **Model fit statistics**

264 There was a progressive increase in the negative log likelihood observed in model one,  
265 model two and model three. This implies that model three explained the determinants better  
266 than either model one or two.

### 267 **Discussion**

268 This study investigated the association of maternal, neonatal and kebele level characteristics  
269 with the of occurrence of neonatal danger signs. It also tried to determine the prevalence of  
270 danger signs in general and specific danger signs in particular among newborns in the study  
271 area.

272 In this study, more than 90 percent of the variability in the occurrence of danger signs in  
273 newborns was explained by individual characteristics. This shows that individual level  
274 characteristics (the kebele composition) were more important than the group/kebele level  
275 characteristics in determining the occurrence of danger signs in newborns.

276 The prevalence of neonatal danger signs was found to be 25%, which means that one in  
277 every four newborns in the study area experienced one or more danger signs in the first 28  
278 days of life. This implies a significant burden of morbidity among the most vulnerable  
279 member of human beings; newborns. Similar finding was also reported in a study conducted  
280 in Ghana(20).

281 Both individual and group level characteristics were significantly associated with the  
282 occurrence of the danger signs. At individual level, birth weight of the newborn, as judged by  
283 the mother, was found to be an important factor in predicting the occurrence of neonatal  
284 danger signs. Even if there were no prior studies found on predictors of neonatal danger signs  
285 in particular, many studies showed that low birth weight is an important predictor of neonatal  
286 mortality (17,21–23).

287 Newborns from mothers that experienced danger signs during the indexed pregnancy and  
288 delivery were associated with higher odds of having danger signs in the newborns. This  
289 indicates that danger signs during pregnancy are important predictors of danger signs in  
290 newborns. This strengthens the need to follow up mothers with danger signs to avoid  
291 undesired outcome of both the mother and the newborn.

292 Coverage of at least one antenatal care was significantly associated with reductions in  
293 neonatal danger signs. Studies in Ethiopia and Kenya showed that mothers that attended  
294 antenatal care were more knowledgeable about neonatal danger signs than mothers that did  
295 not(24,25). Mothers with better knowledge of neonatal danger signs also tend to have better  
296 health and care seeking behavior (14). Hence, the effect of antenatal care attendance on the  
297 occurrence of neonatal danger signs in this study could be because of better knowledge of  
298 danger signs among mothers that attended antenatal care, which might have affected better  
299 care seeking behavior resulting in reduction in the occurrence of neonatal danger signs.

300 Health extension workers experience was negatively associated with the occurrence of  
301 danger signs in newborns. Long years of experience could mean better knowledge of the  
302 area, culture and care seeking behavior of the community. This knowledge of the area might

303 have helped the health extension workers to plan and implement health promotion and  
304 disease prevention activities that positively impact the occurrence of danger signs in  
305 newborns.

### 306 **Conclusion**

307 This study demonstrated that the burden of illness among newborns is high in the study area.  
308 It also revealed that both individual and kebele level characteristics determine the occurrence  
309 and non-occurrence of danger signs in newborns. Individual level characteristics (the kebele  
310 composition) were also found to be more important than the group/kebele level  
311 characteristics in determining the occurrence of danger signs in newborns.

312 Improving coverage of maternal health services, particularly antenatal, delivery and postnatal  
313 care, is important to reduce neonatal danger signs and thereby reduce the associated neonatal  
314 mortality. Educating mothers about neonatal danger signs during pregnancy and delivery and  
315 strengthening the health extension program is critical. Most importantly, strengthening  
316 postnatal home visits of both the mother and the newborn is important to identify and treat  
317 newborn danger signs early.

### 318 **Limitation of the study**

319 One of the limitation of this study could be a recall bias associated with the length of time  
320 mothers were expected to report their experience. To reduce this bias, the interviewers  
321 mentioned each danger signs one by one and gave mothers adequate time to respond. A  
322 prospective cohort study may give more estimates of the determinant of newborn danger  
323 signs.



324 **List of Abbreviations**

325 ANC: Antenatal Care

326 AOR: Adjusted Odds Ratio

327 CBNC: Community Based Newborn Care

328 CI: Confidence Interval

329 EDHS: Ethiopian Demographic and Health Survey

330 HEP: Health Extension Program

331 HEWs: Health Extension Workers

332 ICC: Intra-Class Correlation Coefficient

333 iCCM: integrated Community Case Management

334 IQR: Interquartile Range

335 ITN: Insecticide Treated Nets

336 SD: Standard Deviation

337 SDG: Sustainable Development Goal

338

339

340

341

342 **Declarations**

343 **Ethics approval and consent to participate:** This study received ethical clearance from the  
344 University of Gondar Institutional Review Board (IRB), Ethiopia. Permission was obtained  
345 from kebele administrations. Verbal informed consent was obtained from the study  
346 participants. For adolescent mothers below the age of 18, informed consent was also taken as  
347 per the National Research Ethics Review Guideline's recommendation for emancipated  
348 minors and with the approval of the IRB. This method of data collection was approved by the  
349 IRB of the University of Gondar

350 **Consent for publication:** Not applicable

351 **Availability of data and Materials:** The dataset contains individuals' private information  
352 and can't be shared publicly. However, data can be made available from the corresponding  
353 author and up on permission of the University of Gondar based on reasonable requests.

354 **Competing interest:** The authors declare that they have no competing interests

355 **Funding:** This is part of a bigger study funded by the University of Gondar. The university is  
356 following whether findings are presented and published. The university has no role in the  
357 design, data collection, analysis and interpretation of the data and in writing the manuscript.  
358 All the statements and findings are the responsibility of the investigators.

359 **Authors' contributions:** TN conceived and designed the study, collected data, performed  
360 the statistical analysis and drafted the manuscript. AG helped in the conceptualization,  
361 design, coordination, and revision of the manuscript. GA designed and coordinated the study,  
362 and revised the manuscript. ZT coordinated the study and revised the manuscript. AW helped

363 in the design, analysis and revision of the manuscript. All authors read and approved the final  
364 manuscript.

365 **Acknowledgement:** the authors of this paper would like to thank the research participants,  
366 Dabat Demographic Health Surveillance site (DHSS) and the local administrations in the  
367 study areas for their support during the conduct of this study.

368

## 369 **References**

- 370 1. Rahman S, Ansari W El. Neonatal Mortality : Incidence , Correlates and Improvement  
371 Strategies. 2012;
- 372 2. WHO. Trends in maternal mortality: Estimates by WHO, INICEF, UNFPA, World  
373 Bank Group and the United Nations Population Division. 2015;
- 374 3. Tran HT, Doyle LW, Lee KJ, Graham SM. A systematic review of the burden of  
375 neonatal mortality and morbidity in the ASEAN Region. -East Asia J Public Heal  
376 South. 2012;1(3):239–48.
- 377 4. WHO, UNICEF. WHO/UNICEF Joint Statement: Home visits for the newborn child:  
378 a strategy to improve survival. 2009. 8 p.
- 379 5. Bay G, Miller T, Faijer DJ. Levels and Trends in Child Mortality: estiamtes developed  
380 by the UN inter-agency group for child Mortality Estimation. 2014.
- 381 6. Bay G, Miller T, Faijer DJ. Levels and Trends in Child mortality: Estimates  
382 Developed by the UN inter-agency Group for child Mortality Estimation. 2014.
- 383 7. The Lancet. An Executive Summary for The Lancet ’ s Series “ A healthy start is  
384 central to the human life course , with birth holding the highest risk of death ,  
385 disability , and loss of development potential , leading to major societal effects .”  
386 2014. 1-8 p.
- 387 8. Oestergaard MZ, Inoue M, Yoshida S, Mahanani WR, Gore FM, Cousens S, et al.  
388 Neonatal Mortality Levels for 193 Countries in 2009 with Trends since 1990 : A  
389 Systematic Analysis of Progress , Projections , and Priorities. PLoSE Med. 2011;8(8).

- 390 9. UN. Every newborn : an draft action plan to end preventable deaths. 2014.
- 391 10. CSA. Ethiopia Demographic and Health Survey, 2011 [Internet]. Central Statistical  
392 Agency Addis Ababa, Ethiopia ICF international Calverton, Maryland, USA. 2011.  
393 Available from:  
394 [http://www.measuredhs.com/pubs/pub\\_details.cfm?ID=596&srchTp=type%5Cnhttp://](http://www.measuredhs.com/pubs/pub_details.cfm?ID=596&srchTp=type%5Cnhttp://scholar.google.com/scholar?hl=en&btnG=Search&q=intitle:Ethiopia+Demographic+and+Health+Survey#4)  
395 [scholar.google.com/scholar?hl=en&btnG=Search&q=intitle:Ethiopia+Demographic+a](http://scholar.google.com/scholar?hl=en&btnG=Search&q=intitle:Ethiopia+Demographic+and+Health+Survey#4)  
396 [nd+Health+Survey#4](http://scholar.google.com/scholar?hl=en&btnG=Search&q=intitle:Ethiopia+Demographic+and+Health+Survey#4)
- 397 11. WHO. Caring for the Newborn at Home: A training course for community health  
398 workers - Facilitator Guide Unit 2 : Home Visits After Birth. 2012;1–151. Available  
399 from:  
400 [http://www.who.int/maternal\\_child\\_adolescent/news/events/2012/Facilitator\\_Guide\\_U](http://www.who.int/maternal_child_adolescent/news/events/2012/Facilitator_Guide_Unit2.pdf)  
401 [nit2.pdf](http://www.who.int/maternal_child_adolescent/news/events/2012/Facilitator_Guide_Unit2.pdf)
- 402 12. Beck D, Frances Ganges, Susan Goldman, Long P. Saving Newborn Lives. Care of the  
403 Newborn Reference Manual. Save the Children. 2004.
- 404 13. Anwar-ul-Haq, Durrani HM, Kumar R, Durrani SM. Recognizing the Danger Signs  
405 and Health Seeking Behaviour of Mothers in Childhood Illness in Karachi , Pakistan.  
406 *Univers J Public Heal.* 2015;3(2):49–54.
- 407 14. Ekwochi U, Ndu IK, Osuorah CDI, Amadi OF, Okeke IB, Obuoha E, et al.  
408 Knowledge of danger signs in newborns and health seeking practices of mothers and  
409 care givers in Enugu state , South-East Nigeria. *Ital J Pediatr.* 2015;41(18):1–7.
- 410 15. Sandberg J, Pettersson KO, Asp G, Kabakyenga J, Agardh A. Inadequate Knowledge

- 411 of Neonatal Danger Signs among Recently Delivered Women in Southwestern Rural  
412 Uganda : A Community Survey. PLoS One [Internet]. 2014;9(5). Available from:  
413 [https://doi.org/10.1016/S0277-9536\(02\)00448-3](https://doi.org/10.1016/S0277-9536(02)00448-3)Get rights and content
- 414 16. Awasthi S, Verma T, Agarwal M. Danger signs of neonatal illnesses : perceptions of  
415 caregivers and health workers in northern India. Bull World Health Organ.  
416 2006;29207(5).
- 417 17. Kananura RM, Tetui M, Mutebi A, Bua JN, Waiswa P, Kiwanuka SN, et al. The  
418 neonatal mortality and its determinants in rural communities of Eastern Uganda.  
419 Reprod Health [Internet]. 2016;13(1):13. Available from: [http://www.reproductive-](http://www.reproductive-health-journal.com/content/13/1/13)  
420 [health-journal.com/content/13/1/13](http://www.reproductive-health-journal.com/content/13/1/13)
- 421 18. CSA. Population census. The 2007 Population and Housing Census of Ethiopia:  
422 Statistical Report for Amhara Region. 2007.
- 423 19. Nigatu SG, Worku AG, Dadi AF. Level of mother's knowledge about neonatal danger  
424 signs and associated factors in North West of Ethiopia: a community based study.  
425 BMC Res Notes [Internet]. 2015;8(1):309. Available from:  
426 <http://www.biomedcentral.com/1756-0500/8/309>
- 427 20. Okawa S, Ansah EK, Nanishi K, Enuameh Y, Shibanuma A, Kikuchi K, et al. High  
428 incidence of neonatal danger signs and its implications for postnatal care in Ghana: A  
429 cross-sectional study. PLoS One. 2015;10(6):1–13.
- 430 21. Kolola T, Ekubay M, Tesfa E, Morka W. Determinants of neonatal mortality in North  
431 Shoa Zone, Amhara regional state, Ethiopia. PLoS One. 2016;11(10):1–11.

- 432 22. Kayode GA, Ansah E, Agyepong IA, Amoakoh-Coleman M, Grobbee DE, Klipstein-  
433 Grobusch K. Individual and community determinants of neonatal mortality in Ghana:  
434 a multilevel analysis. BMC Pregnancy Childbirth [Internet]. 2014;14(1):165.  
435 Available from:  
436 <http://bmcpregnancychildbirth.biomedcentral.com/articles/10.1186/1471-2393-14-165>
- 437 23. Titaley CR, Dibley MJ, Agho K, Roberts CL, Hall J. Determinants of neonatal  
438 mortality in Indonesia. BMC Public Health [Internet]. 2008;8(1):232. Available from:  
439 <http://bmcpublihealth.biomedcentral.com/articles/10.1186/1471-2458-8-232>
- 440 24. Kibaru EG, Otara AM. Knowledge of neonatal danger signs among mothers attending  
441 well baby clinic in Nakuru Central District, Kenya: cross sectional descriptive study.  
442 BMC Res Notes [Internet]. 2016;9(1):481. Available from:  
443 <http://bmresnotes.biomedcentral.com/articles/10.1186/s13104-016-2272-3>
- 444 25. Nigatu SG, Worku AG, Dadi AF. Level of mother's knowledge about neonatal danger  
445 signs and associated factors in North West of Ethiopia: a community based study.  
446 BMC Res Notes [Internet]. 2015;8(1):309. Available from:  
447 <http://www.biomedcentral.com/1756-0500/8/309>
- 448

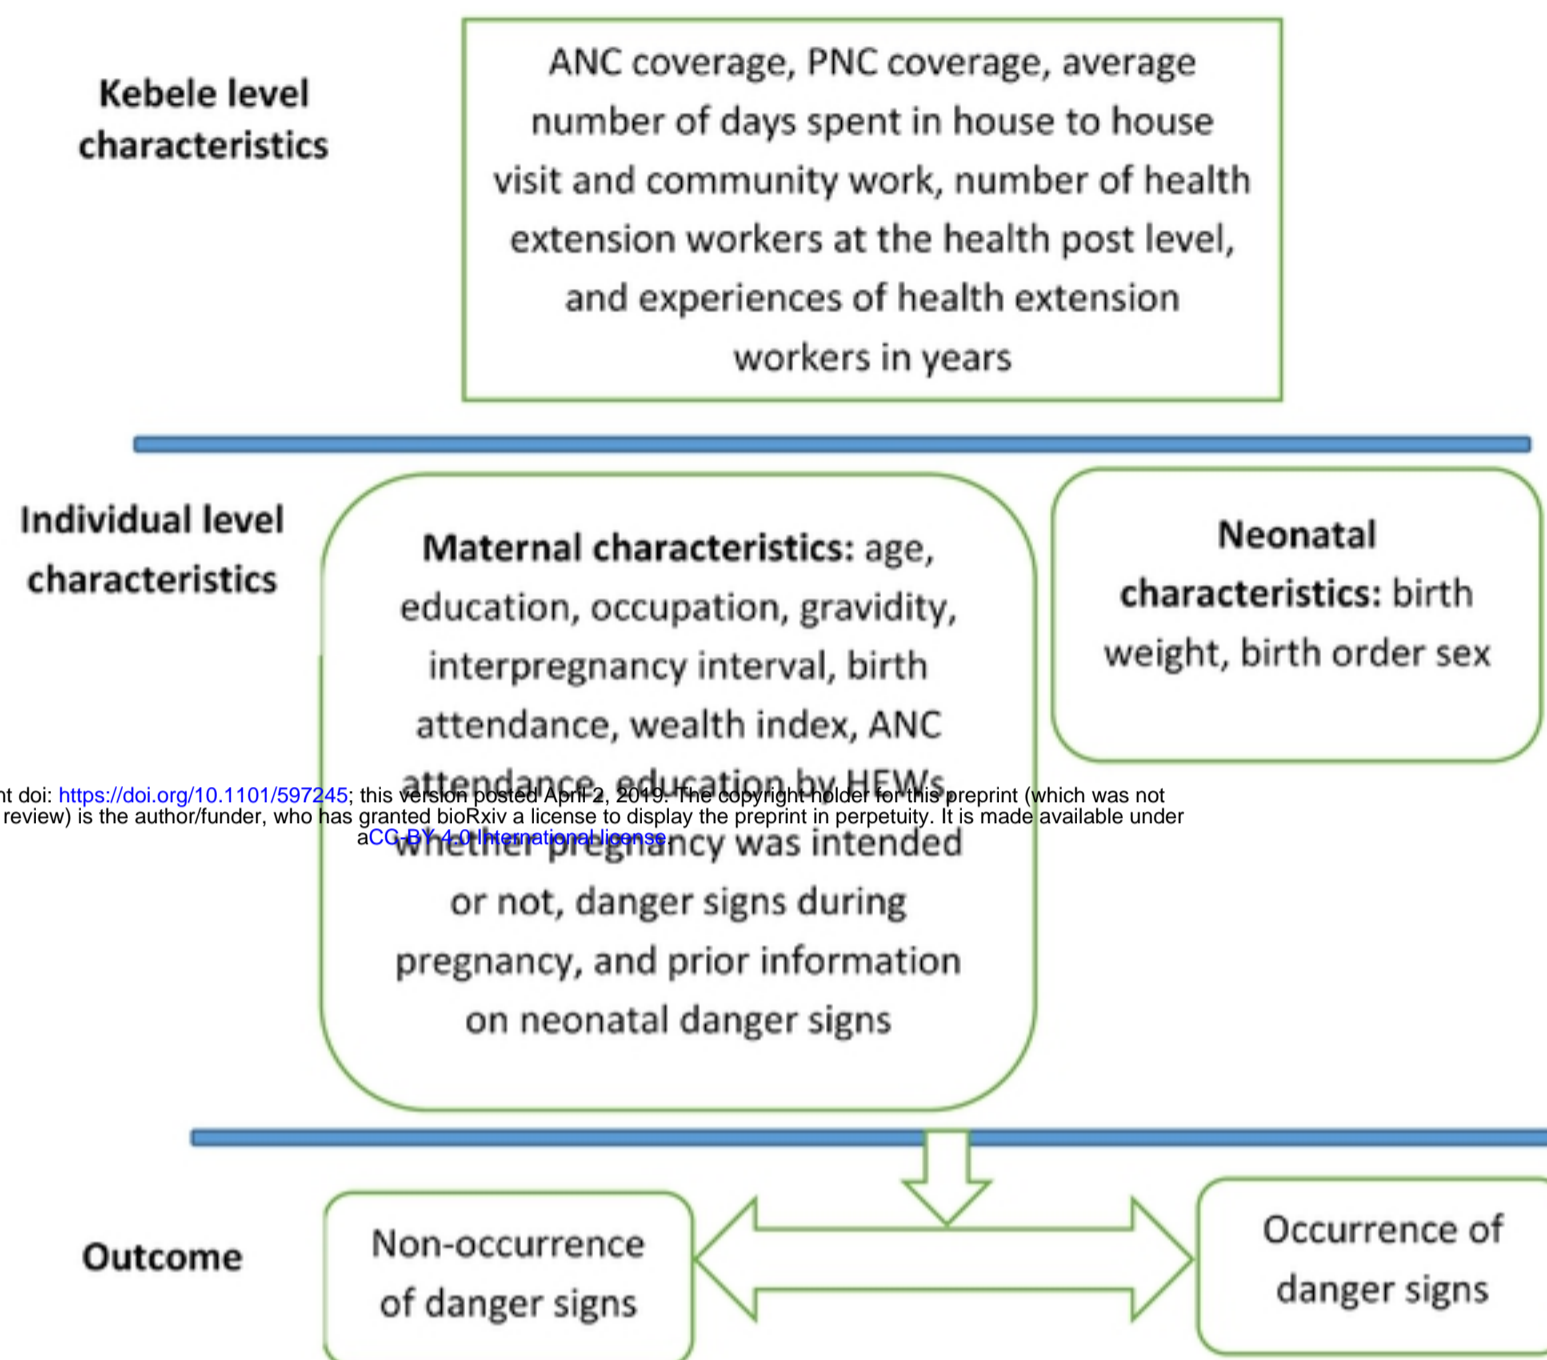

bioRxiv preprint doi: <https://doi.org/10.1101/597245>; this version posted April 2, 2019. The copyright holder for this preprint (which was not certified by peer review) is the author/funder, who has granted bioRxiv a license to display the preprint in perpetuity. It is made available under aCC-BY 4.0 International license.

**Figure 1:** Conceptual framework for individual & Kebele-level determinants influencing neonatal danger signs
